# Supplementary material for: Anxiety at age 15 predicts psychiatric diagnoses and suicidal ideation in late adolescence and young adulthood: results from two longitudinal studies
Source: Springer Nature journal article supplement (doi:10.1186/s12888-019-2349-3), 2019-11-14

### Self-report

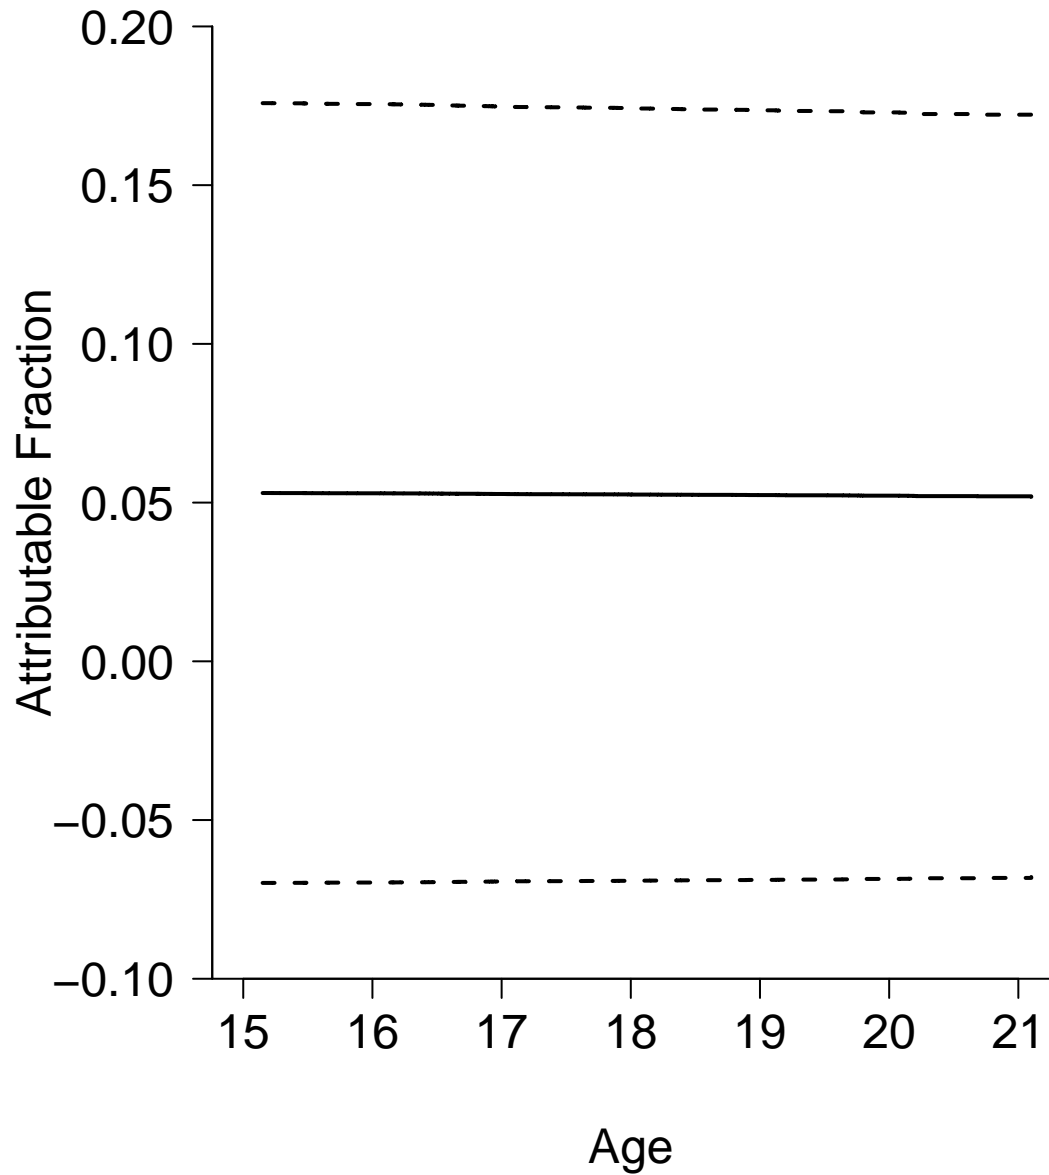

### Parental report

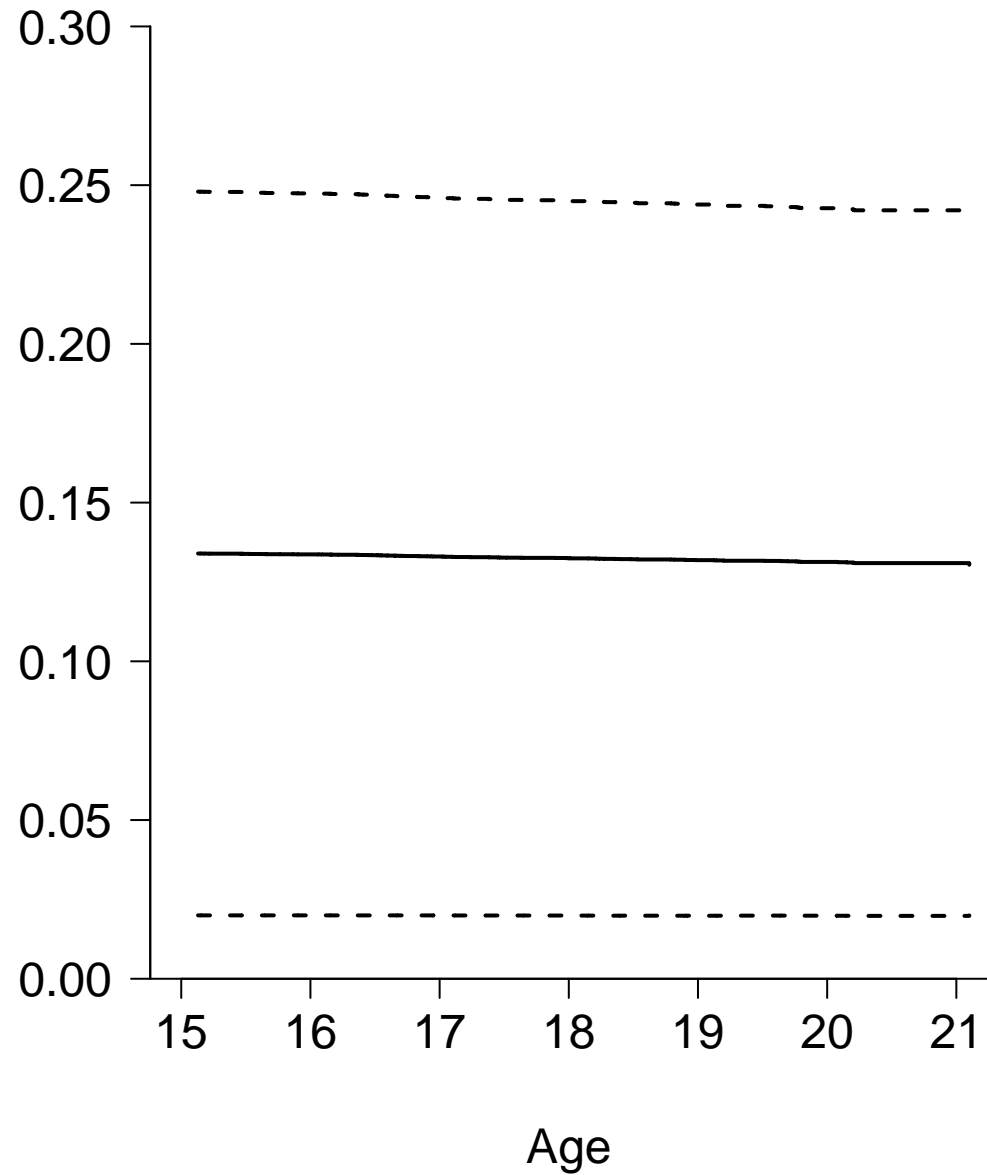

Supplement: MOESM7 [file 17388538]
